# Supplementary material
Source: PubMed Central journal article supplement (PMC2259090)
Supplement: plntphys_pp.107.108779_1.pdf [file plntphys_pp.107.108779_1.pdf]

Figure S1A

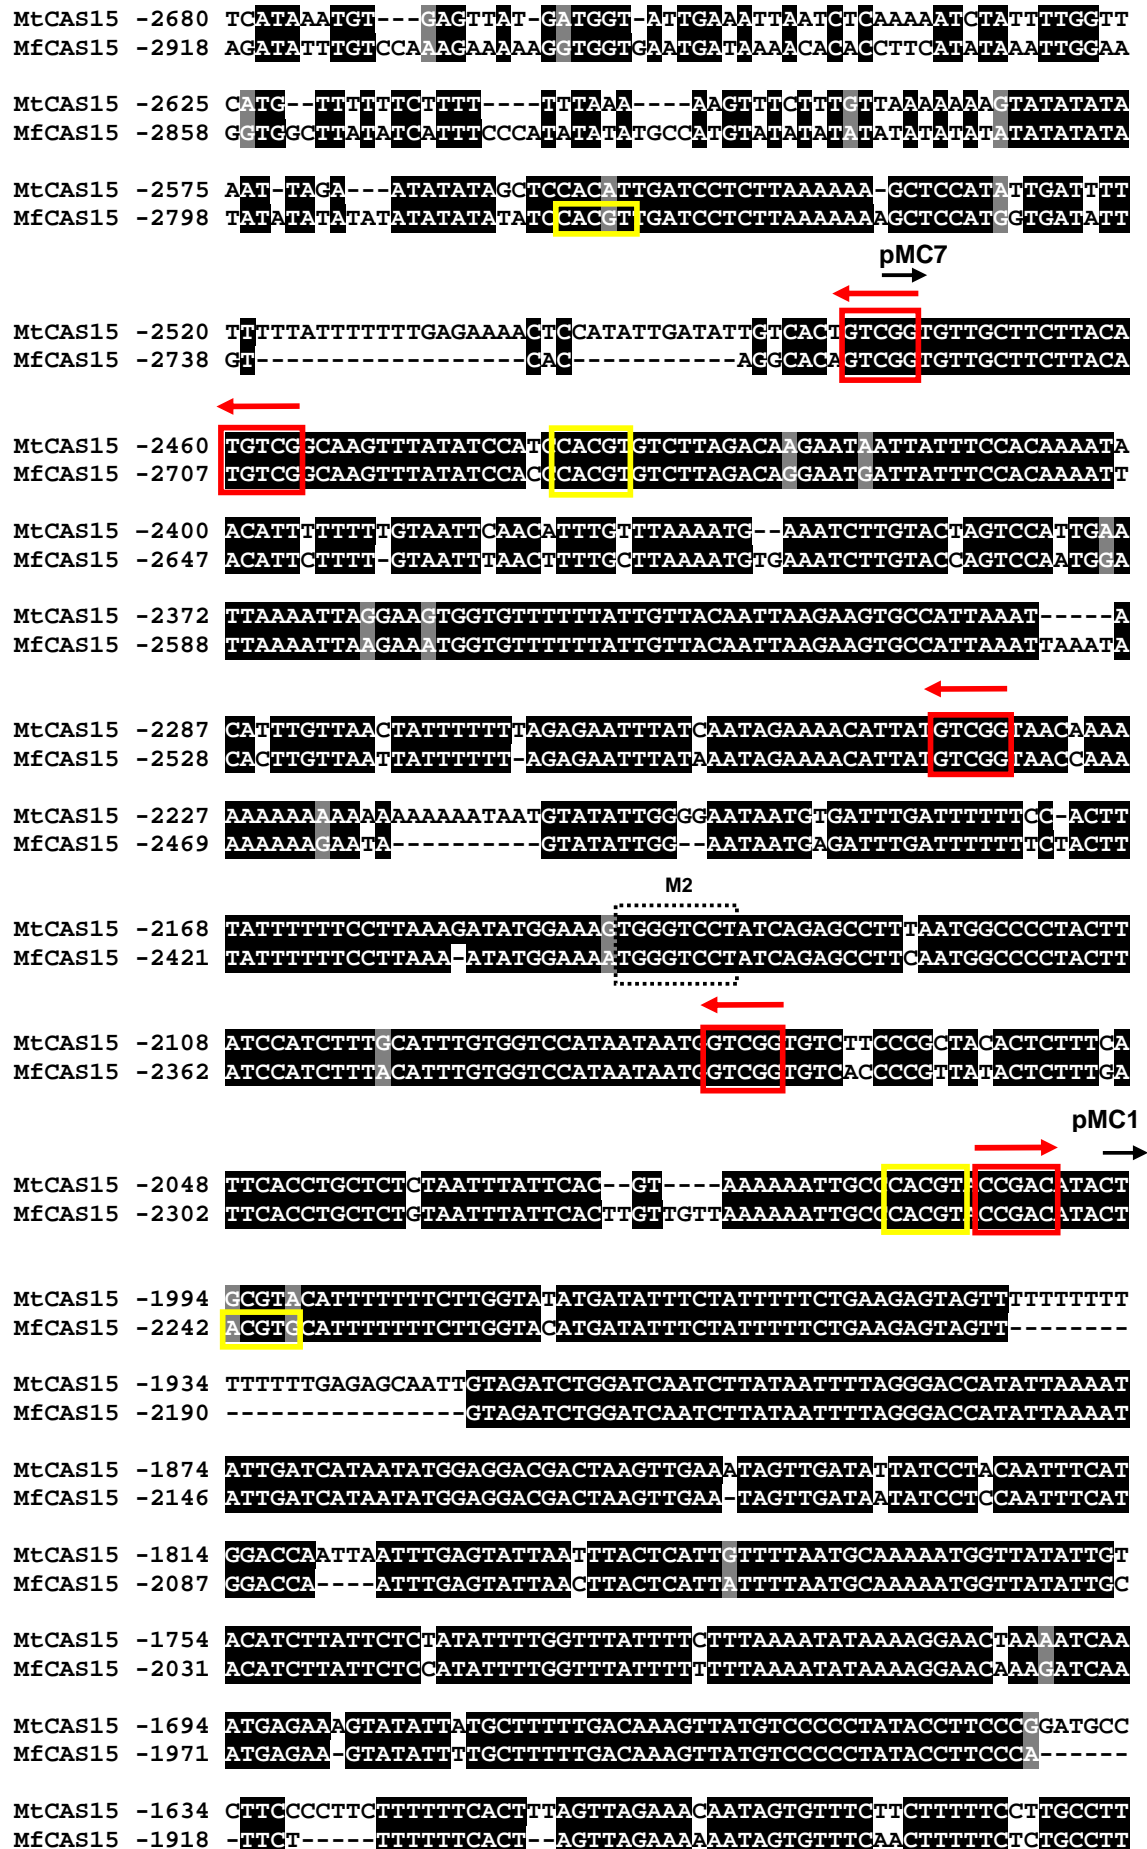

Begin *CAS15* distal promoter identity block ↓

MtCAS15 -1574 ACGAAATTATTAGAGAATTTCCCAAAAATATAAATACTACAAGTACT-----  
MfCAS15 -1866 CTGAAATTATTAGAGAATTTA CCAAAAATATAAATACTACCGGTACTAGGAAAGAATAT

MtCAS15 -1574 -----  
MfCAS15 -1806 GATAAATAAATAAAGATTAATAAACCTTATTTTTCTCTCATTTTATTAATAAAAAAATTG

MtCAS15 -1574 -----  
MfCAS15 -1746 AAAGAAAACTGAAAAGAAAGAGTAAATACACAATATAAATATAAAAGAGAATATTGTTT

MtCAS15 -1526 -----CATTCGTT  
MfCAS15 -1686 AACCAATTATCACAAAATAATTGTACACAAATATCATTTCTCATAAATAAAATA CAGTACT

MtCAS15 -1519 CCATAAATCGAGTGTTAATTCATCGAGTTTACATTTTAA---GTATCAAATCGTCTCA  
MfCAS15 -1626 CCCAAAGGAGAGTCTAGAACCATTAA---TGCATTTCTATCCGAATAATGAACCTAACA

MtCAS15 -1462 ACTCGGAGGTAAACTCGAATTCGATAAAATTGGAACTTTGACCGAGTT--TGACTTGAG  
MfCAS15 -1569 ATT-GGA--TATATTCG-TTGATGATTTGTTT--AATGCATGTCGATATCCTGATTT-AG

MtCAS15 -1404 TTAACCTCAATCAAATCAGCTAAACTCGAGTAAATCGG-AATGTAAGTCTAAACTATTT  
MfCAS15 -1516 A-AACTTGAT-ATTAGCAC-ITCAACGCTCATATCTTCTTTGAATAGCTTCTCTATTA

MtCAS15 -1345 TTATAGTTTTATTACAACCTTAGGAACCTGTGAACTTGCCA--TTTTGGATCTTAAG  
MfCAS15 -1459 CACAAAACCTACTA-CA-CTT-AGGCTCC----AAATCTGCCAAGTTTTAACTCTCAAC

MtCAS15 -1287 ACTCAAGAGACTTATGACTTTCCAACTTTATTTTGTATTTGATGTTTACTTGAAACATAA  
MfCAS15 -1406 GGTCCA-ATCCTAACCTCTTGACACC--TGTTTGGTTCCAAAATATCTTATAGATCATTG

MtCAS15 -1227 T--AAGTGGTTGAAAACCTTTATAATTTAGTCATATTTTGCACCTATTATACTTTTACAA  
MfCAS15 -1349 TCCAATCTGATTATATGAATTTGAATT-GTGCCATCACGAGCTTTTCATGCTGCATAGAA

MtCAS15 -1169 TATATATTAGTTTACAT-ATGTCATGTAATAATAAATTTTATTTAATTTTAAATTTTAG  
MfCAS15 -1290 ACCCTTACTAAAAAAGCATGT--TGCATAGAAGCCACTTTTTTT--TTTT--TTTTG

MtCAS15 -1110 ATAACTCGTACGAGTTTATGAGTCGAATTTACTTAGCAAACGAATTGAGGTAAATTC  
MfCAS15 -1237 ACAAG-TCATAGAAGCCACTTGTTTTTTAATTTAGTTTAAAGAAAATGAAATACGTAC

MtCAS15 -1050 TCAAATATAAAATCTGCTAGTTCTAAAAAATAATATCATAAACCAATCCTCTTAATAA  
MfCAS15 -1178 TCA---TATAAGAT-TGTTAGTACTAATTTAAGTATTTATTTAACCACACACAAGACTAA

MtCAS15 -990 AAAATAGGATAATGTTT--CATGTA-CACACTTTTTTCCA-----TACACACATATACC  
MfCAS15 -1122 AATCTAAATTTTTCTTAAACAAAATCACATTTTTTTAAAAATATTTCAAGTATGTTT

MtCAS15 -938 ACTC-CATGTGAGAGTGTG-----TGAGAGACAATA---CA-----TATGAGTTT  
MfCAS15 -1062 TCTAACATGTGCAAGATTCATAGGATAAGAGGTAATTAATGCACCCACTTTATAGTTT

MtCAS15 -897 TTTTGTGTGTGG--GGGATCACAAAGACACTTGTCAAATATATGTGGGTCTACAAGT  
MfCAS15 -1002 CTTCAAATTTTATTAATGATC-CAATGTC-CTTG---AAATTTGATTTTTTT-TCCTTCT

MtCAS15 -839 GGTACATGTCACCTAAGGTCTCTATGTATCC---CTACTCAAAAAA-TATGACAAA-T  
MfCAS15 -948 CTTCCCGTTAACTACAATATTTTTT-TTCCCTTCTCTCTCTATTAACATATACACACT

MtCAS15 -785 AATGGACTACTCC-CAAAGGAGGTCTAGAATACAGAACAATTTATTTGCACAATCAAT  
MfCAS15 -889 TACAGGTCTTTTCTTCGAAGGTTAAT-TA-AATGCAAAAAAATAAATAA---AAATCATT

MtCAS15 -726 GCATTTCTTATC-CGAATAATG-AACCTAA--CAATTTGGACATATTCT--TTGATGATT  
MfCAS15 -834 CC---TCAAATTGAGAGTAATGTAACCAAAATCAAATGAGTGTGTTCAAATTTAACAATA

MtCAS15 -672 TGT--TTAATGCA--TGTGATATCCCGATTTAGAACTTTATCTTAACA-CTTCATAC  
MfCAS15 -777 GAACCAAAATTCAAAATCACAGTCATCAAATGACCGTTTTTAAATTTGACAGCAATATAA

MtCAS15 -618 GCC---TCATATCTTCTTTGAATAGCTTCTCTATTACAAAAACTACTACTTTAGGC  
MfCAS15 -717 CCAAATTCAAAATGACGGTGTTCAAATTTGACAAAATAACGAAAACCT-CAAAATGATGGTG

MtCAS15 -561 TCCAAATGTGCCAAGTTTAACTACTCAACTGTCTAATCCTAACCTCTTGACACCTGTTT  
MfCAS15 -658 TCCAAAA-TGACG-GTGTT--CAAATTGACAG-CAAATATAACCAAAATCAAATGATG

MtCAS15 -501 G-GTTCAAAA-ACA----TCTTAT-AG-ATCATTGTCCAATTTAGTTA----TATCCAA  
MfCAS15 -603 GTGTTCAAAATGACGGTGTTCAAATGAGTATAAATGGGCTGTTCTTTTTTCACTTTTCATA

MtCAS15 -453 T--TTGAATTGTACCATCA---C-GAGCCTTCATGTTGCAT-AGAAACCACTTTCTTTTG  
MfCAS15 -543 TCCTTGATAAAGTCCTTCAAGCTGAAGAAGAACTGACATGAGAGTAAATTAATTTTA

MtCAS15 -400 TTACTTTT-----AGTTTAAGAAA--ATAAAACA--AACT-ATGTCAAATTTGTTACTAAT  
MfCAS15 -483 GCACAGATGAACAAGAAATAAAGCATGAAAAATCATTACAGAGGAGAGAAGCAAGGAAAA

MtCAS15 -350 TTAACCAAACAAG-AC-TAAAAATC-----TGAATCTTCCTTAGC-----AAAATTAAT  
MfCAS15 -547 AAATCAATTTTCAAGGACATTGAATCATTAAATAGATTGAAATAAACCTGTAAAGTGAAT

End CAS15 proximal promoter identity block ↓

MtCAS15 -301 ATTTTTTTTAA-TCAT-TCTAAGACTAAAT-GC-CA-ATTAAAAATATACCTTT-----  
MfCAS15 -363 ACCTTAATTACCTCTTACTTATGCAATGTTGCACCGT TAAAAAAAACCCTTCTAGATA

MtCAS15 -253 --TTTTGTTAATAGC---CAATTAAAAATATACCTTATCATATAAAATCTTTAACAAA---  
MfCAS15 -303 TATTTTGTTTTGAGAGGATCATTCTAAGTATACCTTATCATATAAAATCTTCAACAAATAA

M4

MtCAS15 -202 -----AATATTAATACATAAATGATGCCTATTTTTAATCA  
MfCAS15 -243 TACATTATTGATGCCTTGTGTCAAAAATAAATACTTATGATGCCTATTTTTAATCA

M5

MtCAS15 -167 GACAATCTTTTTCAAAAAGAAAAATAATTAATACAATTAGACACGTATAGAGGACACGT  
MfCAS15 -183 GACAATCTTTTTCAAAAAGAAAAATAATTAATACAATTA CAC--GTCCAGAGGATACGT

MtCAS15 -107 CCATGGTTATTTTGTAGTCATTCCACATAAATGGTGTGGAT-----TG-----T  
MfCAS15 -125 CCATGGTTATTTTGTAGTCATTCCACATAAATGGTGTGGATAACATTTTATATGTTCTTAT

M1

MtCAS15 -64 TTTGGTTTTTGTCTTCACTTATAAGCCTATAAA TACCATT-GATCATCTCCTTAGTATA  
MfCAS15 -65 TTTTGTTTTTTGTCTTCACTTATAAGCCTATAAA TACCATTGATCATCTCCTTGCATA

+1 MtCAS15

M3 ↓

MtCAS15 -5 ACATCAAATCAAAAACA----AAACAAAGAAGAAACACATTCATAAATTCATAGAAAGAA  
MfCAS15 -5 ACATCAAATCAAAAACA GAACAAACAAAGAAGAAACACATTCAT---TT-----AGAA

MtCAS15 +51 ACAATAGATATACAATATG  
MfCAS15 +45 ACAATAGAAATACAATATG

Figure S1B

MfCAS30 -5906 TTAGGTCAAAAGATCATTAAAAGTGGAGAATTAAGTGAATTTTGATGTAGTTTGATGTA  
MfCAS30 -5846 GGCAGATGTTAATTAGTCATAGAACACGTTTATAGATGATGATTGGTGATAAATTAGAGGGC  
MfCAS30 -5786 TGGGTAGTGAGAATTCGAGTGCAGAGATGAGAGAAAAGAGCTGTGACAGAACCCTGTTCTG

pMC8  
→

MfCAS30 -5726 TCATCGCTCGCAGCTGCGAGTGATCCTACCCGCACCTGCGAGTAACCCTTTTAGCTCGCC  
MfCAS30 -5666 ACTGCGAGCAATGTTGTCCGCAACTGCGAGCTTCCCGTTGAGCTCGCCACTGCGAGTTA  
MfCAS30 -5606 GTGCAGTACAGACCTGATGTTGTGCGAAATTGTGTCTTTTCGCCCGTTGCTTTGATGAGT  
MfCAS30 -5546 TAGTTTCTGATGTTTACAATAATGATGATGCTGCTAATTATGATGTTCCAGTGTGCTGT  
MfCAS30 -5486 TTTGATGTAATGAGTTTTGTGAATTATTAGTTAATTAATTAACATTAATAAATGAAGATT

← 9

MfCAS30 -5426 GTTGCATTTAGAGTCGAGTTGTTGCATGTCGCGCGATGGGGGCTTAATGCCTGACAGGTT

→ 8

MfCAS30 -5366 CTTATGACCTTAGCGATGGGGGCTTAATGTCGCGCGTCCAAATATGACCTTAGCGATGG  
MfCAS30 -5306 GGGCTTAATGCCCTGGTGGTACCACATGCATGTTGATGTTGTCTAAGCTGTTGTTGATGT  
MfCAS30 -5246 TGTGTTGTCATTGTAGAGTCGTCATAACTCAAATAAATGATGAATGTTGTGATGATGTTG  
MfCAS30 -5186 CTGCCCTGTTGTTGTTGTTGTTGTTGCCATTAATTATAATAATGTAAACGAAGTGAATTAA  
MfCAS30 -5126 GATGAATCTGCTGCCCTTGAATAACTATGAAGTTGTTGGTTACTTAACCTGTTAAATGA  
MfCAS30 -5066 CGATTAATGATGATATTAAGTTAGATATGTGATGTTGTTATCTTTTATGAATATTAT  
MfCAS30 -5006 TTGTTTTTAATGAATGTGAAATCTCACCCCTTCTGCGTATATGTTGCCCTCGACCGTGGGT  
MfCAS30 -4946 AATGTGCAGGTAATAAAGACTAGCTGTGTTGTTGAGTAGACTCCTCACATCGTGTGCTCT  
MfCAS30 -4886 AGGATGCTCTGATACGTAACGGGATGGGGATTGCTGATGCTTGTTCCTTGTACGTA  
MfCAS30 -4826 TTTTATTTAATAAATGTTGAACATTTTTATGAAGACTATTTGAGATGTTAAGTTGTGGCC  
MfCAS30 -4766 TTTTCATGCCAAAGATTTTATGTGACGTTGCGAACTAAATTTCCGCTGCATTTGATATTG  
MfCAS30 -4706 AATTTTATAAAGACAGGTTGCTTAAATAAATAGTATTTTCTAGTATTATTTGTTGTTA  
MfCAS30 -4646 AATGATGAATTGATGTATGTGATGCTCCGTTATGTTGATAAACTCTGATAATTTTTATGA

← 7

MfCAS30 -4586 AATTTTTTAAAGTTCGGGAAAACGGGGTGTTACAATATATGGTTTGAGTTTCTTTTTATATAA  
MfCAS30 -4526 AAGGGGGCAATAAAAATGATTTTCTATATTCGGGACGAGTTTGGGTACGGGTTCCGGGAGG  
MfCAS30 -4466 GTATACCTATATCTCTGTAACCTCATCCAGTGCCCGTGTTTTGAAATCGGGAAAAACTCAA  
MfCAS30 -4406 ACCGAGTCAAAGCGGGGAAAAACCATTAAATTGAGTTTGATTGAGATGGGTACTCGGGC  
MfCAS30 -4346 ATGGGTTTTGTTGCCATGCCTAGATACAATACATAAAAAAAAAACAATTTAACTAATTA  
MfCAS30 -4286 TATGTAACCTGATTGTTGTTCCATGTATGATTTGTACAACAATATTAGTTAGTGTCTAATT  
MfCAS30 -4226 AATTAGAGAGTAACGTTTGTGATGTTTTTTTTTTTATAACCATTCTTTGAAAGGATATAA  
MfCAS30 -4166 TGATTAATAATGAATAATGATTAATAAATAATTTTATAATATGACATTAAGATAAAACC  
MfCAS30 -4106 AAAAAACATATGAACATCATTTATACAAAAGAAGTAATCTTGAAGGTGTGAATTTTATG  
MfCAS30 -4046 TAAAGTAGTTGATTTCTCATAATAAATACTAACCCTGTATAATTTATAAATGAGAAA  
MfCAS30 -3986 GATTTTGTAACCTCCCAAAGTTATGTTATTTTGTGATCATCCAATTGGATATAAATTGAAT  
MfCAS30 -3926 AAATTTGGATGTAAAAATATGTATCAGTGAGAAATAGTCTTGTCTTTTTTCTTTTTTAT  
MfCAS30 -3866 TTACTCCTTTTTTCTTGTGTTTTTTTTAAGTATCGGTATAAAATGTTTCTCCTATATTTT  
MfCAS30 -3806 TTATATTATTACATAAGTGAAATGATTTTATCAATGTTTTTTATTAGAAACACACGATCAG  
MfCAS30 -3746 ATAAAATCATATGTACGTCATAAAGTTTATTTTTTAGTAAATGTAAATTTGTTACGAATTT  
MfCAS30 -3686 AAAAAACGACTTCAATAAATTTATAGATTTTTTTTTATGTGATAAAAACCACCTCTTTTAAA  
MfCAS30 -3626 AAAATAATTGAGACCCGTTTTGTTACAAATTAATAAAGTGAATTTGATATCTTTTA  
MfCAS30 -3566 ATTAAGAGAATTTATAAAACAAATCATGATTTATTTGTTTGGTAATTGTAATTAATCA  
MfCAS30 -3506 ACATGTTTTAATAAATTAATTTGTTGATACAACTATAAAAAAATGGATTTTTGTT  
MfCAS30 -3446 ACAAAATTACATCAACTTTATAATTAGAGAAAGATTAACCTTAATAAATTAGAGAAAAGATA  
MfCAS30 -3386 ATAGATTGTAAATTGTTTTTAACTCTTTAGATATTAGAAAGTTGGATTATAGAAAAATCT  
MfCAS30 -3326 ATTTTGATTGGGATTAAGATTAAGTTTGTGTTGCTCTATAGAAAAGATTAAGTTAGAGTG  
MfCAS30 -3266 TTTTATCAAGTGAGTTTGTTTTAAATTTGTTCTTAAGAGAGAAAATATAGGGGGAGGTTGA  
MfCAS30 -3206 AGCAAAGACGCAAATGATATAATTTTGATGACGACTCAAATTAAGAAGGGGTAATAA  
MfCAS30 -3146 TGTATTTTTGCTACACATTAAGTTTATAAATTAGAGAATAAATGATTAGAAAATAAAGA  
MfCAS30 -3086 TTAAGTTTGTGTTGTTATTTAAAAAAGATTAAGTTAGTGTGATTTATCGAATGAGTTTGT  
MfCAS30 -3026 TTTAATTTGTTTTTAAAGAGAAAAAATAGAGGGAGTTGAAGCATAAAACACAAAAGGA  
MfCAS30 -2966 TATAATTTTGATGATGTGTCAAAATATTAAGAAGGATAAGATTGATTTTTGTTAGACG  
MfCAS30 -2906 TTAAGTTTTATAATTAGAGAAAAGAATAGATGTGAGAAATTTTCAGGGGAATTTGAATGAC

→ 6

MfCAS30 -2846 CATTACAACAATGATGGTAGTACCCTTTACCATATTAGTCATACTGACCGACATCAATTT

→ 5

MfCAS30 -2786 TTTCTTTAAAGCAACTGTCGCGACATCAATTAACATAACAAAATATCTAAAACATCGA  
MfCAS30 -2726 GTAAAATATGGGAGTTTGTTTTTAAGTTTCGACAGAGCTGGAGTGCATGATTGCAATCATT  
MfCAS30 -2666 GCCTGATTTTCATCTCAATGCTTAGGAGATACATCCTATTGCTGTGTTGGATTATGAATG  
MfCAS30 -2606 ATCTTAATTAATTAATAAAAATAAATAAAGTTATAAAAATTTAATAATGCTACTCTTTT  
MfCAS30 -2546 GTTTCAAAATTTTTAATCCGCACTATTTACTTAGTTTATTTTGACCATATTTTTTAACT  
MfCAS30 -2486 AATGTTCTGCTATCCAATATTTTTTAAATTTTATTTTGACCATATTTTTTAACTAATGTT

MtCAS31 -1724 -----TTTTGGCATCATATTTG  
MfCAS30 -2426 CTGCTATCCAATATTTTTAATTAATATTCTATTATCCATTTT TTTTGCATGATATTTG

MtCAS31 -1707 GATAGAGGGAAATCTCTATAATCCAATTTTC-CTAGACTTTTTTCGTTATCCACTCAAA  
MfCAS30 -2366 GATAG--GGGAAATCTCTATATCTATTTTTTTCTAGACTTTTTTCGTTATCCACTCAAA

MtCAS31 -1648 ACAAATAAGGTTAGCCAAATGGGACGATGAGTTGATGAAAGAGTGGTGTATGACTTTG  
MfCAS30 -2308 AAA--AACAAAGGTTAGCCAAATGGGGCAGTGAGTTGATGATGAGTGGTATTAGGACTTTG

pMC2  
→

MtCAS31 -1588 AGTGGAGAAGGGATCTTTTT--CGAAGGGAGGAGCATTTGTTGGGTGAACTTTTGAATATTC  
MfCAS30 -2250 AGCGGAGAAGCGGTCTTTTTTGAAGGATGTGCAC TTGTTGGGTGAGCTTTTGAATATTT

M2  
.....  
↓

MtCAS31 -1529 TCTA-TACTATTTGAGTCAAAAAGTAGAAAGATAAATGGATTTGGTCCTTGAATCTACA  
MfCAS30 -2190 TCTAATACTATTTGAGTCAAAAAGGAAAAAGATAAATGGATTTTGGTCCTTGAATCCACA  
.....  
↓

MtCAS31 -1470 AACCTCTTCATAGTGAAATCCTTATATGACTCTTTTAAGAGGTAAAATCTTTCCTCCACC  
MfCAS30 -2130 AATCCCTCCACGGTGAATTTTATATG--TCTTTTAAGTAGTAAAAGCTTTCCTCCGCC

MtCAS31 -1410 GGATTTAAGTGTGGCGTCTAGAAGAGGGCTAAGGCAATTGGACTAGTTTGACTCCCA  
MfCAS30 -2072 AGATTTAAATGTGGTGTCTAGAAGAGGGTTAGGCAATTGGACTAGTTTGGCTCCCA

4  
→

MtCAS31 -1350 AAAAGTCAAATTTTCTCATGCAATTAACCTTTGGTAGACTTCCGACTCGCTCAAACCT  
MfCAS30 -2012 AAAAGTCAAATTTTCTCTGGCAACTAATCTTTGGTAGACTTCCGACTCGCTCAAACCT

3  
←

MtCAS31 -1290 ATCTTGAAGAGGAGCTTTGCCAGTTGGTGTGACTTCGATTGTGTGTGGGTTCGGATAT  
MfCAS30 -1952 ATATGGAAAGAGGAGCTTTGTCGGTTGGTGTGACTTTCGATTGTGTGTGGGTTCGGATAT

pMC10  
→

MtCAS31 -1230 TCAAGAGGGCAATGATCACTTGTTTTGTAGATGTAGTAGCTTTGTTGGAATGATTTGGT  
MfCAS30 -1892 TCGACAT-----CCACTAGTTTTGTAGCTGTAA---CTTTGTTGGAAGGATTTGGT

MtCAS31 -1170 ATGCAATTTTTAAATGGATTAGACCAGGGTG-TTTTACCCAATAATA-----TCCT  
MfCAS30 -1844 ATGCAATTTTCAAATGGATGAAATAGGGTGATTTTATCCGGTTATACCGTTTCAGTCTCT

MtCAS31 -1120 TGACTATATTTTTTTCATCTCTTTTACTAAAAAATTCGAAAGGGGCTTACTCATT  
MfCAS30 -1784 TGACCAT-TTTTCATCATCTCTTTTGTAAAAAA-ATCGAAAAGGGCTTATCTCATT

MtCAS31 -1060 GGTATGCAAGGATTTGAAAATTT-GGACAGCTCGAAATGAGGATTTTTTTT--CTAGAAT  
MfCAS30 -1726 GGATGCAACAATTTGAAAATTTAGGAC-GCTCGAAATAGAGTTTTTTTTTTCTAGAAC

pMC8 Begin CAS30/CAS31 distal promoter identity block  
←

MtCAS31 -1003 GTGGGAGCTGCAAGAGATTGTAGAAGTCATCAAATCACCTTTTAAAAATGCTTTATGCA  
MfCAS30 -1667 TTGGGAGCATGAGGAGATTGTAGAAGTCATTAAATCACCTCTTAGAGATGATTTATGCG

MtCAS31 -943 TATAATGGTAGGGATA-TTCATATTATATGCAGGAGCCGGAGTTCGAATCTGGACACTT  
MfCAS30 -1607 TTCGAAATTAGGCATCCTTC---TTTATATTACGAA--CGGTTTCAAATCTTTAGTTT

MtCAS31 -884 TATTTTCCATAAT--TAAATTGTGTGAACTTTAAACCATAGACTATTTGAT-----AA  
MfCAS30 -1552 GTCCTATCTCTTATGGTACCTTTGGTTCGCAAGAA--AGAAGAAGCATGGATAGGTTAAG

MtCAS31 -832 AATTGTTAAAAAATTA-----GGGGTTC-TTC-TTTGT---AATG---CAATTAGTTT  
MfCAS30 -1494 GACGGAAGCACGCTAAACAAGAAACCTTCATCATTTGTTTAAATGGAACAATAAGATA

MtCAS31 -786 -TCGAACCCCTCCATTGGATCTTTGTTTTTTCCGAGCGGATCTATTATATTTCTCT-  
MfCAS30 -1434 CTCCTCCGTCCCTCAATAGATGATTTAGTTGCAATATA-CAT-AATTACTTGAATATA

MtCAS31 -728 CATTAAAAAATCGTTCTATTATGATTTCTTAACTTAGATT-TATGATGGTCGAAAGTAT  
MfCAS30 -1376 CTTTGATCACATTTTTCTACTA--ATTCAAAAGATAAATAATATCATGTAAGATCTTGT

MtCAS31 -669 ACATTAACAATACTAAGAAGCTTAAATTTAGTTTGGCACATCCATCATTTTTTTAATCTGT  
MfCAS30 -1318 TGATTCGTCT-CGATGAATTTTTTAAAAATATA-AATTTTCATAATTTTTT-----TTA

MtCAS31 -609 **GTAA**AATATCTAAGG**GA**TAAAT--TAACTCATTCA**TC**TATGTATGTGTG**C**-----  
MfCAS30 -1264 **GTAGACA**AATTGAAGATATCAAGATA**AAAA**CATAT**CA**T**TGG**TATGTGTG**TC**GAAGTCAAC

MtCAS31 -561 -----  
MfCAS30 -1204 TATGTCATCTATTGAGGGACGGAGGGAATAGAAAAGAAAGACATGCGGGACCCACACTAC

MtCAS31 -561 -----  
MfCAS30 -1144 AAAATGTTTTCCACCCACTTCTGTGCAGAAAGGTTGGGAAAGCGCTGCATTTCCATCTTTA

MtCAS31 -561 -----  
MfCAS30 -1084 CCCATATAAATAAATAATATAATATGGTACTATGTATAATACTATTATATATCACTTAAA

MtCAS31 -561 -----  
MfCAS30 -1024 AGTTAAAAGTTAAAACAAGTATAGTATTATATGTGGTAAACAGTATAGTATTGTATAGTA

MtCAS31 -561 -----TTAAATCTTTTTTTTACTTTTATCTATAAAATTTTACTTTATTTTC  
MfCAS30 -964 TATCTACAATCAAATA**TT**CA**TT**CT**CA**TGTATACTTT**AA**CA**TAT**CA**AT**TTTT**TA**TTT**AT**TAA

MtCAS31 -517 **AAAA**AAAAAATTATAAAATTTATT**CA**TTTATGTAT**CT**GT**GC**TTAAATC**---**TTT**TA**TTTTT  
MfCAS30 -904 **TAGC**TAAATATTAATATATTATATTAAATAAATAAATAAATAAATAAATAAATTAATAATTCATTT**CA**TTTTA

MtCAS31 -458 ---TATGAAAATACCTAATAAATA**---**AGGATA**---**ACTTAGTTTGG**CA**ACATCTT**AC**ATTTTT  
MfCAS30 -844 TCATAAGGATATTTATGTCATTT**CA**AAAATATACATC**---**TTT**---**CTT**---**TCCTTT**CA**CTTTT

MtCAS31 -403 **TAA**---T**---**CTGATTGACACTACGTATACCTCTT**CA**CTCTTAAGATCACAGT**---**TATTTCT  
MfCAS30 -758 **TC**ACTTAT**TC**CA**AA**CA**AC**CC**AA**AA**AA**T**---**CA**TC**---T**---**ACT**---**TT**CT**---T**---**CACTTT**CA**TT**CT**

MtCAS31 -348 GATTG-----TTTTATATAGTCATAATATGGT**CA**GC**TT**ACTCCTAAA**AA**AGC---  
MfCAS30 -732 **TA**ATCATTCTTTCC**TT**TTT**CA**CTT**---**TC**TT**---TCCTCT**CA**ACATC**---**CTCCAACATAGCCTT

MtCAS31 -300 -----  
MfCAS30 -677 AATGTTGAATATTTGTTTTTTTTTACATGACGAATACCCCTTGTTCTTTTCTCACTATCTA

MtCAS31 -300 -----  
MfCAS30 -617 ATAAATTTTATTGTTAAAAA**AAAA**AATTAGAATGGTTTTCATTCTCTTTTTGGTCATATTG

MtCAS31 -300 -----  
MfCAS30 -557 TAT**TC**CAATTTTTGGATTTCATTTTACTCTTTAAGTTTTTTATTTTCGTTTCATTTTAGTT

MtCAS31 -300 -----  
MfCAS30 -497 ATTAAGTTATAAAAAAAAAAATCGTTCATCATGATCTCTTA**ACT**TATATTTATGATGGT

MtCAS31 -300 -----  
MfCAS30 -437 GGAAAGTATATCCATTACAAATACTAATAAGGTTAATTTAGTTTGGCAGCATCCTTCATT

MtCAS31 -300 -----  
MfCAS30 -377 TTTTAATCTGTGTA**AA**ATATCTAAGGGATTAATTA**ACT**CTTT**CA**CATGCAGTTATAATAT

↓ End CAS30/CAS31 proximal promoter identity block

M4

MtCAS31 -300 ---AAGT**GTA**ACTAAATGAAGC**TT**TATCCATTTTACTTT**CA**CAATCACAA**---**GTTCTTC  
MfCAS30 -317 GGT**GAG**T**GTA**ACTAAATGAAGC**TT**TATCCATTTTACTTT**CA**TAAATCACAA**AG**TTCTTC

M5

MtCAS31 -244 **TT**TACATAAAACACCCTCT**CA**---TACTCGCACAAAG**---**AC**GTG**TCATCTTATAAAATCACAAA  
MfCAS30 -257 **TC**TCACAAACACCCTCATA**---**TACTCACACAAAG**---**AC**GTG**TCATCTCATAAAATCACAAA

← 2

MtCAS31 -185 **CG**ACAACATCACTTTCTCTTT**CA**---TAAACACACC**---**AA**---**CACGTATCCTT**GT**AC**GTG**CGC  
MfCAS30 -197 **CG**ACAACATTACT**---**GT**CGG**TACTCAATAAAACACACC**---**AA**---**CACGTATCCTT**GT**AC**GTG**CGC

1

MtCAS31 -127 **AT**TC**AA**CGTTAC**---**CAC**GTG**TCAGATATTTGCAAATCCAAAT**---**CAATTT**CA**CCGA  
MfCAS30 -137 **AT**CA**AA**TGTTA**---**CAC**GTG**TCAGATATTTGCAAATCCAAAT**---**TC**AA**AC**---**CAATTT**CA**CCGA



Figure S1. Alignment of the *M. falcata* and *M. truncatula* CAS upstream genomic regions. (S1A) *CAS15*. (S1B) *CAS30/CAS31*. The downward pointing arrows at +1 identify the first nucleotide of the transcript as determined by 5' RACE. Consensus CRT/DRE (CCGAC) and ABRE (CACGT) motifs are boxed in red and yellow, respectively. Alignments were made using ClustalW in combination with GeneDoc (Nicholas et al., 1997) and were formatted using BOXSHADE 3.2 ([http://www.ch.embnet.org/software/BOX\\_form.html](http://www.ch.embnet.org/software/BOX_form.html)). The 5' end points of the pMC constructs pMC1, pMC7, pMC2, pMC10 and pMC2+8 are indicated by the rightward pointing horizontal arrows above the sequences, the 3' end point of pMC2+8 is indicated by the leftward pointing arrow.
